# Supplementary material for: In Vitro and In Vivo Protective Effects of Lentil (Lens culinaris) Extract against Oxidative Stress-Induced Hepatotoxicity
Source: MDPI journal article supplement (doi:10.3390/molecules27010059), 2021-12-23
Supplement: s1 [file s1]

# **Supporting Information**

**Materials and methods**

**3 Tables**

**References**

## **Materials and methods**

### *1. Total polyphenol content*

Total polyphenol content of BLE was measured using the modified method of Folin-Denis [23]. BLE (0.1 mL) was mixed with 0.1 mL of the Folin-Ciocalteu reagent (0.5 X), 1 mL of 10% (w/v) sodium carbonate, and 8.8 mL of distilled water. After 1 h, the absorbance at 700 nm was measured with a UV/visible spectrophotometer (UVIKON 922, Germany). Gallic acid (10–100 µg/mL;  $R^2 = 0.9986$ ) was used as the standard, and the results were expressed in mg/g gallic acid equivalents (GAE).

### *2. Total flavonoid content*

Total flavonoid content was determined using the modified method of Nieva Moreno [1]. BLE (0.5 mL) was mixed with 0.1 mL of 10% (w/v) ethanolic solution of aluminum nitrate, 0.1 mL of 1 M potassium acetate and 4.3 mL of distilled water. After 40 min, the absorbance at 415 nm was measured using a UV/visible spectrophotometer (UVIKON 922, Germany). Quercetin (12.5 –400 µg/mL;  $R^2 = 0.9987$ ) was used as the standard, and the results were expressed in mg/g quercetin equivalents (QE).

### *3. Cell viability assay*

Cell viability was determined using the 3-(4,5-dimethylthiazol-2-yl)-2,5-diphenyltetrazolium bromide assay. Briefly, AML12 cells were plated in 96-well culture plates at a density of  $1 \times 10^4$  cells/well in culture medium and allowed to attach for 24 h. The medium was then replaced with 200 µL of new medium containing various concentrations of BLE at 37 °C for 24 h. After incubation, the cells were washed and

treated with or without H<sub>2</sub>O<sub>2</sub> (7 mM) for 1 h, and 10 µL of MTT stock solution (5 mg/mL in PBS) was added to each well and incubated for another 3 h. The media were then carefully removed, and insoluble purple formazan crystals were dissolved by adding 100 µL of DMSO, and the absorbance was measured at 540 nm.

#### *4. Preparation of FFA-conjugated bovine serum albumin (BSA)*

FFA stock solutions were prepared by conjugating free fatty acids with BSA. Briefly, sodium palmitate and sodium oleate were dissolved at a concentration of 250 mM. This FFA stock solution was then added to a pre-warmed 11% w/v BSA solution (37 °C) to achieve a FFA concentration of 25 mM, and this solution was allowed to incubate in a water bath for an additional 10 min.

#### *5. Measurement of intracellular ROS levels*

The levels of intracellular ROS were measured by flow cytometry using the peroxide-sensitive fluorescent probe 2',7'-dichlorofluorescein diacetate (DCF-DA) as previously described [2]. Briefly, AML12 cells were treated with BLE for 24 h and the medium was replaced with new medium containing H<sub>2</sub>O<sub>2</sub> (7 mM). After 1 h incubation with H<sub>2</sub>O<sub>2</sub>, the cells were washed with PBS and incubated with 25 µM DCF-DA for 30 min at 37 °C. The cells were then washed twice with PBS and detached by treatment with trypsin-EDTA. The detached cells were collected and resuspended in PBS, and the fluorescence intensity of the cells was measured using flow cytometry (BD FACSVerse, BD-Biosciences, San Jose, CA).

#### *6. Quantitative real-time polymerase chain reaction (PCR) and western blot analyses*

Quantitative real-time PCR and western blot analyses were performed as previously described [3]. Table S1 shows the primer sequences. The intensity of the protein bands was quantitated using ImageJ.

#### *7. Measurement of the serum levels of AST, ALT, and lipids*

The serum levels of AST, ALT, and lipids (total cholesterol, triglyceride, HDL-cholesterol, and LDL-cholesterol) were measured by DooYeol Biotech (Seoul, Korea).

#### *8. Histopathological evaluation of liver injury*

For histological liver damage score, an expert liver pathologist blindly reviewed all samples. A detailed histological analysis was prospectively performed as follows: (1) injury: presence of balloon cells, Mallory bodies, feathery degeneration, (2) necrosis, apoptosis (apoptotic body, acidophil body, or councilman body); (3) fatty change: steatosis; and (4) inflammatory cell infiltration: presence of macrophages, T lymphocytes, neutrophils, and dendritic cells.

#### *9. Determination of GSH content and antioxidant enzyme activity*

To determine GSH content and enzyme activities, cell lysates and liver homogenates were prepared in a reporter lysis buffer (Promega, St. Wisconsin, Madison) and ice-cold 0.1 M potassium phosphate buffer (pH 7.5), respectively. The protein content was determined using a BCA assay kit (Sigma-Aldrich Chemical, St. Louis, MO) according to the manufacturer's instructions. GSH content was determined by the

enzymatic method as previously described [4]. GSH content was measured by an increase in absorbance at 412 nm for 5 min in a final 1 mL reaction mixture containing 0.1 M sodium phosphate buffer (pH 7.6), 5  $\mu$ M EDTA, 0.6 mM 5,5-dithiobis (2-benzoic acid), 0.2 mM NADPH, 1 unit/mL GR, and 10  $\mu$ L lysate. The level of malondialdehyde was measured as previously described [4]. GR activity and GPx activity were measured using a commercially available GR assay kit (Cayman Chemical Co., Ann Arbor, MI) and a GPx assay kit (Abcam, Cambridge, MA), respectively. One unit of GR represents 1  $\mu$ mol of NADPH consumed/min, and its specific activity was expressed as nmol NADPH/min/mg protein. Catalase and SOD activities were measured as previously described [4].

**Table S1.** Sequence of the primers used for qPCR

| Target gene  |           | Primer sequence             |
|--------------|-----------|-----------------------------|
| <i>Gapdh</i> | Sense     | 5'-GTATGACTCCACTCACGGCA-3'  |
|              | Antisense | 5'-GGTCTCGCTCCTGGAAGATG-3'  |
| <i>Gss</i>   | Sense     | 5'-GAAGCAGCTCGAAGAAGTGG-3'  |
|              | Antisense | 5'-AGCACTGGGTACTGGTGAGG-3'  |
| <i>Gclc</i>  | Sense     | 5'-CTGCACATCTACCACGCAGT-3'  |
|              | Antisense | 5'-GTCTCAAGAACATCGCCTCC-3'  |
| <i>Gclm</i>  | Sense     | 5'-CCAAAACATCTGGAAACTCCC-3' |
|              | Antisense | 5'-CGGGAACCTGCTCAACTG-3'    |
| <i>Sod1</i>  | Sense     | 5'-ACCATCCACTTCGAGCAGAA-3'  |
|              | Antisense | 5'-AAAATGAGGTCCTGCACTGG-3'  |
| <i>Sod2</i>  | Sense     | 5'-AACTCAGGTCGCTCTTCAGC-3'  |
|              | Antisense | 5'-GCTTGATAGCCTCCAGCAAC-3'  |
| <i>Gpx2</i>  | Sense     | 5'-AGGTCGGACATACTTGAGGC-3'  |
|              | Antisense | 5'-GGTAGTTCTCGGCTTCCCTT-3'  |
| <i>Cat</i>   | Sense     | 5'-CCCGCGGTCATGATATTAAGT-3' |
|              | Antisense | 5'-GATGAAGCAGTGGAAGGAGC-3'  |
| <i>Gr</i>    | Sense     | 5'-ATCGTG CATGAATTCCGAGT-3' |
|              | Antisense | 5'-GGTGGTGGAGAGTCACAAGC-3'  |

*Gapdh*; Glyceraldehyde 3-phosphate dehydrogenase, *Gss*; glutathione synthetase, *Gclc*; glutamate-cysteine ligase catalytic subunit, *Gclm*; glutamate-cysteine ligase modifier subunit, *Sod1*; superoxide dismutase 1 (soluble), *Sod2*; superoxide dismutase 2 (mitochondrial), *Gpx2*; glutathione peroxidase 2, *Cat*; catalase, *Gr*; glutathione reductase.

**Table S2.** Effects of BLE on body weight and food intake in BALB/c mice

|                              | Normal                  | CCl <sub>4</sub>         | BLE100                  | BLE400                  |
|------------------------------|-------------------------|--------------------------|-------------------------|-------------------------|
| Body weight gain<br>(g/week) | 2.51±0.53 <sup>a</sup>  | 2.19±0.10 <sup>ab</sup>  | 1.46±0.44 <sup>bc</sup> | 0.57±0.77 <sup>c</sup>  |
| Food intake<br>(g/week)      | 37.38±1.94 <sup>a</sup> | 34.09±4.42 <sup>ab</sup> | 29.79±4.87 <sup>b</sup> | 28.12±1.62 <sup>b</sup> |

All results are expressed as means ± SD (Normal, n=4; CCl<sub>4</sub>, n=8; BE100 and BE400, n=7). Different letters are significantly different among groups, according to ANOVA with Duncan's multiple range test ( $P < 0.05$ ).

**Table S3.** Effects of BLE on histopathological changes in liver tissues of CCl<sub>4</sub>-treated BALB/c mice

|                                    | Normal | CCl <sub>4</sub>           | BLE100      | BLE400      |
|------------------------------------|--------|----------------------------|-------------|-------------|
| Injury (%)                         | ND*    | 9.69±11.13 <sup>ns**</sup> | 2.50±0.00   | 6.43±6.51   |
| Necrosis (%)                       | ND     | 30.00±11.95 <sup>ns</sup>  | 34.29±15.12 | 32.86±14.96 |
| Inflammatory cell infiltration (%) | ND     | 22.50±10.35 <sup>ns</sup>  | 18.57±12.15 | 20.00±10.00 |

\*ND: not detected.

\*\*ns: not significant.

All results are expressed as means ± SD (Normal, n=4; CCl<sub>4</sub>, n=8; BE100 and BE400, n=7).



## References

1. V.L. Singleton, Naturally occurring food toxicants: phenolic substances of plant origin common in foods. *Adv. Food Res.* 27 (1981) 149-242.
2. M.I. Mieva Moreno, M.I. Isla, A.R. Sampietro, M.A. Vattuone, Comparision of the free radical-scavenging activity of propolis from several regions of Argentina. *J. Ethnopharmacol.* 71 (2000) 109-114.
3. H.S. Lee, S. Safe, S.O. Lee, Inactivation of the orphan nuclear receptor NR4A1 contributes to apoptosis induction by fangchinoline in pancreatic cancer cells. *Toxicol. Appl. Pharmacol.* 332 (2017) 32-39.
4. E.Y. Hwang, M.H. Yu, Y.S. Jung, et al., Defatted safflower seed extract inhibits adipogenesis in 3T3-L1 preadipocytes and improves lipid profiles in C57BL/6J ob/ob mice fed a high-fat diet. *Nutr. Res.* 36 (2016) 995-1003.
5. S.O. Lee, H.W. Lee, I.S. Lee, et al., The pharmacological potential of *Sorbus commixta* cortex on blood alcohol concentration and hepatic lipid peroxidation in acute alcohol-treated rats. *J. Pharm. Pharmacol.* 58 (2006) 685-693.
